# Supplementary material
Source: MDPI journal article supplement (https://www.mdpi.com/2311-7524/9/12/1351)
Supplement: s1 [file s1]

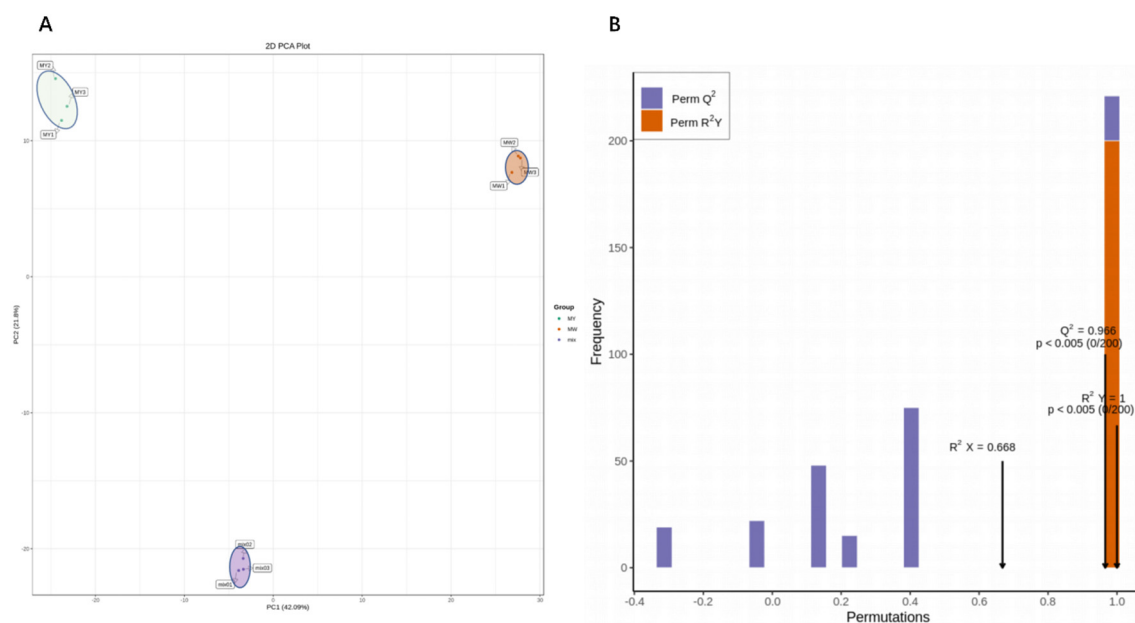

**Figure S1.** The main component analysis (PCA), orthogonal signal correction, and OPLS-DA model plots (A) Green is *R. liliiflorum* white part (W) and orange is yellow part (W) of *R. liliiflorum*, purple is *R. liliiflorum* quality control sample. (B) The OPLS-DA model plots of MY compared to MW.

**Table S1.** Differential flavonoid metabolites in the white and yellow fractions of *R. liliiflorum*.

| Formula                                           | Compounds                                                 | Class II              | Type |
|---------------------------------------------------|-----------------------------------------------------------|-----------------------|------|
| C <sub>15</sub> H <sub>12</sub> O <sub>4</sub>    | Pinocembrin (Dihydrochrysin)                              | Flavanones            | down |
| C <sub>15</sub> H <sub>10</sub> O <sub>5</sub>    | Baicalein                                                 | Flavones              | up   |
| C <sub>15</sub> H <sub>10</sub> O <sub>5</sub>    | 6-Hydroxydaidzein                                         | Isoflavones           | up   |
| C <sub>15</sub> H <sub>14</sub> O <sub>5</sub>    | Epiafzelechin                                             | Flavanols             | up   |
| C <sub>15</sub> H <sub>14</sub> O <sub>5</sub>    | Afzelechin (3,5,7,4'-Tetrahydroxyflavan)                  | Flavanols             | up   |
| C <sub>16</sub> H <sub>12</sub> O <sub>5</sub>    | 3,7-dihydroxy-4'-methoxyflavone                           | Flavones              | down |
| C <sub>15</sub> H <sub>12</sub> O <sub>6</sub>    | Fustin                                                    | Flavanonols           | up   |
| C <sub>17</sub> H <sub>14</sub> O <sub>5</sub>    | Pterocarpine                                              | Isoflavones           | down |
| C <sub>16</sub> H <sub>12</sub> O <sub>7</sub>    | Azaleatin (5-O-Methylquercetin)                           | Flavonols             | down |
| C <sub>19</sub> H <sub>18</sub> O <sub>5</sub>    | Eucalyptin (5-Hydroxy-7,4'-dimethoxy-6,8-dimethylflavone) | Flavanones            | up   |
| C <sub>20</sub> H <sub>18</sub> O <sub>10</sub>   | Kaempferol-3-O-arabinoside (Juglanin)                     | Flavonols             | up   |
| C <sub>21</sub> H <sub>22</sub> O <sub>9</sub>    | O-MethylNaringenin-8-C-arabinoside                        | Flavonoid carbonoside | up   |
| C <sub>20</sub> H <sub>19</sub> O <sub>10</sub> + | Cyanidin 3-xyloside                                       | Anthocyanidins        | down |
| C <sub>22</sub> H <sub>32</sub> O <sub>12</sub>   | Di-O-galloyl Methyl gallate                               | Flavanols             | down |
| C <sub>23</sub> H <sub>25</sub> O <sub>12</sub> + | Malvidin-3-O-glucoside (Oenin)                            | Anthocyanidins        | down |
| C <sub>23</sub> H <sub>25</sub> O <sub>12</sub> + | Malvidin-3-O-galactoside (Primulin)                       | Anthocyanidins        | down |
| C <sub>23</sub> H <sub>22</sub> O <sub>13</sub>   | Quercetin-3-O-(6"-acetyl)galactoside                      | Flavonols             | up   |
| C <sub>22</sub> H <sub>20</sub> O <sub>14</sub>   | Mearnsetin-3-O-glucuronide                                | Flavones              | down |
| C <sub>24</sub> H <sub>22</sub> O <sub>13</sub>   | 6"-O-Malonylgenistin                                      | Isoflavones           | up   |
| C <sub>24</sub> H <sub>22</sub> O <sub>14</sub>   | Kaempferol-3-O-(6"-malonyl)galactoside                    | Flavonols             | up   |
| C <sub>24</sub> H <sub>22</sub> O <sub>14</sub>   | Kaempferol-3-O-(6"-malonyl)glucoside                      | Flavonols             | up   |
| C <sub>25</sub> H <sub>24</sub> O <sub>14</sub>   | Chrysoeriol-7-O-(6"-malonyl)glucoside                     | Flavones              | up   |
| C <sub>24</sub> H <sub>22</sub> O <sub>15</sub>   | Quercetin-3-O-(6"-malonyl)galactoside                     | Flavonols             | up   |

|                                                   |                                                                     |                       |      |
|---------------------------------------------------|---------------------------------------------------------------------|-----------------------|------|
| C <sub>24</sub> H <sub>22</sub> O <sub>15</sub>   | Quercetin-7-O-(6''-malonyl)glucoside                                | Flavonols             | up   |
| C <sub>30</sub> H <sub>24</sub> O <sub>12</sub>   | Tetrahydroxyflavan-(4 $\alpha$ -8-epicatechin)                      | Flavanols             | up   |
| C <sub>30</sub> H <sub>28</sub> O <sub>12</sub>   | Isosalipurposide-6''-O-p-coumaric acid                              | Chalcones             | up   |
| C <sub>27</sub> H <sub>22</sub> O <sub>15</sub>   | Quercetin-3-O-(4''-O-galloyl)arabinoside                            | Flavonols             | up   |
| C <sub>27</sub> H <sub>30</sub> O <sub>15</sub>   | Kaempferol-3-O-glucoside-7-O-rhamnoside                             | Flavonols             | up   |
| C <sub>27</sub> H <sub>31</sub> O <sub>15</sub> + | Cyanidin-3-O-rutinoside (Keracyanin)                                | Anthocyanidins        | up   |
| C <sub>27</sub> H <sub>28</sub> O <sub>16</sub>   | Apigenin-6-C-(2''-glucuronyl)glucoside                              | Flavonoid carbonoside | up   |
| C <sub>28</sub> H <sub>33</sub> O <sub>15</sub> + | Peonidin-3-O-rutinoside                                             | Anthocyanidins        | up   |
| C <sub>27</sub> H <sub>31</sub> O <sub>16</sub> + | Delphinidin-3-O-rutinoside                                          | Anthocyanidins        | up   |
| C <sub>31</sub> H <sub>32</sub> O <sub>13</sub>   | Phloretin-4'-O-(6''-Feruloyl)glucoside                              | Chalcones             | down |
| C <sub>28</sub> H <sub>24</sub> O <sub>16</sub>   | Quercetin-3-O-(6''-galloyl)glucoside                                | Flavonols             | down |
| C <sub>28</sub> H <sub>32</sub> O <sub>16</sub>   | Tamarixetin-3-O-rutinoside                                          | Flavonols             | up   |
| C <sub>28</sub> H <sub>32</sub> O <sub>16</sub>   | 6-C-Methylquercetin-3-O-rutinoside                                  | Flavonols             | up   |
| C <sub>28</sub> H <sub>32</sub> O <sub>16</sub>   | Isorhamnetin-3-O-neohesperidoside                                   | Flavonols             | up   |
| C <sub>28</sub> H <sub>32</sub> O <sub>16</sub>   | Isorhamnetin-3-O-galactoside-7-O-rhamnoside                         | Flavonols             | up   |
| C <sub>28</sub> H <sub>32</sub> O <sub>16</sub>   | Isorhamnetin-3-O-glucoside-7-O-rhamnoside                           | Flavonols             | up   |
| C <sub>28</sub> H <sub>32</sub> O <sub>16</sub>   | Chrysoeriol-6-C-glucoside-4'-O-glucoside                            | Flavonoid carbonoside | up   |
| C <sub>29</sub> H <sub>36</sub> O <sub>15</sub>   | Farrerol-5,7-di-O-glucoside                                         | Flavanones            | down |
| C <sub>27</sub> H <sub>30</sub> O <sub>17</sub>   | Quercetin-5,4'-di-O-glucoside                                       | Flavonols             | down |
| C <sub>27</sub> H <sub>30</sub> O <sub>17</sub>   | Quercetin-3,7-diglucoside                                           | Flavonols             | up   |
| C <sub>30</sub> H <sub>27</sub> O <sub>15</sub> + | Delphinidin-3-O-(6''-O-caffeoyl)glucoside                           | Anthocyanidins        | down |
| C <sub>31</sub> H <sub>30</sub> O <sub>15</sub>   | Luteolin-7-O-(6''-eudesmyl)glucoside                                | Flavones              | down |
| C <sub>29</sub> H <sub>32</sub> O <sub>17</sub>   | Kaempferol-3-O-(6''-Acetyl)glucosyl-(1 $\rightarrow$ 3)-Galactoside | Flavonols             | down |
| C <sub>36</sub> H <sub>36</sub> O <sub>18</sub>   | Isoorientin-7-O-(6''-p-coumaroyl)glucoside                          | Flavonoid carbonoside | down |
| C <sub>20</sub> H <sub>19</sub> O <sub>10</sub> + | Cyanidin-3-O-arabinoside                                            | Anthocyanidins        | down |
| C <sub>37</sub> H <sub>38</sub> O <sub>18</sub>   | Vitexin-7-O-(6''-feruloyl)glucoside                                 | Flavonoid carbonoside | down |
| C <sub>21</sub> H <sub>20</sub> O <sub>10</sub>   | Genistein-7-O-galactoside                                           | Isoflavones           | up   |
| C <sub>21</sub> H <sub>20</sub> O <sub>10</sub>   | Apigenin-5-O-glucoside                                              | Flavones              | up   |
| C <sub>20</sub> H <sub>19</sub> O <sub>11</sub> + | Delphinidin-3-O-arabinoside                                         | Anthocyanidins        | up   |
| C <sub>22</sub> H <sub>22</sub> O <sub>10</sub>   | Glycitin (Glycitein 7-O-Glucoside)                                  | Isoflavones           | down |
| C <sub>22</sub> H <sub>22</sub> O <sub>10</sub>   | Calycosin-7-O-glucoside                                             | Isoflavones           | up   |
| C <sub>22</sub> H <sub>22</sub> O <sub>10</sub>   | Acacetin-7-O-galactoside                                            | Flavones              | up   |
| C <sub>21</sub> H <sub>20</sub> O <sub>11</sub>   | Luteolin-3'-O-glucoside                                             | Flavones              | up   |
| C <sub>21</sub> H <sub>20</sub> O <sub>11</sub>   | Kaempferol-4'-O-glucoside                                           | Flavonols             | up   |
| C <sub>21</sub> H <sub>21</sub> O <sub>11</sub> + | Cyanidin-3-O-glucoside (Kuromanin)                                  | Anthocyanidins        | down |
| C <sub>21</sub> H <sub>21</sub> O <sub>11</sub> + | Cyanidin-3-O-galactoside                                            | Anthocyanidins        | down |
| C <sub>21</sub> H <sub>21</sub> O <sub>11</sub> + | Cyanidin-3-O-glucoside chloride                                     | Anthocyanidins        | down |
| C <sub>21</sub> H <sub>24</sub> O <sub>11</sub>   | Epicatechin glucoside                                               | Flavanols             | up   |
| C <sub>21</sub> H <sub>24</sub> O <sub>11</sub>   | Sieboldin                                                           | Chalcones             | down |
| C <sub>21</sub> H <sub>24</sub> O <sub>11</sub>   | Epicatechin-6-C- $\beta$ -D-glucopyranoside                         | Flavanols             | up   |
| C <sub>21</sub> H <sub>24</sub> O <sub>11</sub>   | Epicatechin-4'-O- $\beta$ -D-glucopyranoside                        | Flavanols             | up   |
| C <sub>21</sub> H <sub>24</sub> O <sub>11</sub>   | Epicatechin-3'-O- $\beta$ -D-glucopyranoside                        | Flavanols             | up   |
| C <sub>21</sub> H <sub>24</sub> O <sub>11</sub>   | 3-Hydroxyphloretin-4'-O-glucoside                                   | Chalcones             | down |

|                                                 |                                                           |                       |      |
|-------------------------------------------------|-----------------------------------------------------------|-----------------------|------|
| C <sub>22</sub> H <sub>22</sub> O <sub>11</sub> | Pratensein-7-O-glucoside                                  | Isoflavones           | up   |
| C <sub>22</sub> H <sub>22</sub> O <sub>11</sub> | Isorhamnetin-3-O-rhamnoside                               | Flavonols             | down |
| C <sub>22</sub> H <sub>22</sub> O <sub>11</sub> | Rhamnetin-3-O-rhamnoside                                  | Flavonols             | down |
| C <sub>22</sub> H <sub>22</sub> O <sub>11</sub> | 8-Methoxykaempferol-7-O-rhamnoside                        | Flavonols             | down |
| C <sub>22</sub> H <sub>22</sub> O <sub>12</sub> | 6-Methoxyquercetin-3-O-rhamnoside                         | Flavonols             | down |
| C <sub>21</sub> H <sub>20</sub> O <sub>11</sub> | Luteolin-8-C-glucoside (Orientin)                         | Flavonoid carbonoside | up   |
| C <sub>21</sub> H <sub>22</sub> O <sub>11</sub> | Eriodictyol-3'-O-glucoside                                | Flavanones            | up   |
| C <sub>23</sub> H <sub>24</sub> O <sub>13</sub> | 5,6,3',4'-Tetrahydroxy-3,7-dimethoxyflavone-6-O-glucoside | Flavones              | up   |
| C <sub>30</sub> H <sub>32</sub> O <sub>19</sub> | Kaempferol-3-O-(6''-Malonyl)glucoside-7-O-Glucoside       | Flavonols             | up   |
| C <sub>37</sub> H <sub>38</sub> O <sub>19</sub> | Kaempferol-3-O-(6''-Feruloyl)glucosyl-(1→4)-galactoside   | Flavonols             | down |
| C <sub>22</sub> H <sub>22</sub> O <sub>12</sub> | Laricitrin-3-O-rhamnoside                                 | Flavonols             | down |
| C <sub>23</sub> H <sub>26</sub> O <sub>11</sub> | Persicoside                                               | Flavanones            | up   |

Note: +represents the substance as a positive optical substance. Down represents the content of the difference in the white part (W) of this difference in the white part of *R. liliiflorum* (W), and UP indicates that the content of the difference in the white part of *R. liliiflorum* (W) is lower than the yellow part (Y).

**Table S2.** The corresponding relationship between unigene and enzyme

| Gene name | Gene number          | regulated |
|-----------|----------------------|-----------|
| CHS       | Cluster-12951.29076  | down      |
|           | Cluster-12951.79840  | down      |
| F3'5'H    | Cluster-12951.24184  | down      |
| FLS       | Cluster-12951.92493  | down      |
| DFR       | Cluster-12951.86723  | up        |
|           | Cluster-12951.153923 | down      |
| GT1       | Cluster-12951.51629  | down      |
|           | Cluster-12951.138355 | up        |
|           | Cluster-12951.69986  | up        |
| BZ1       | Cluster-12951.124492 | up        |
|           | Cluster-12951.147714 | up        |
|           | Cluster-12951.138886 | up        |
| LAR       | Cluster-12951.85487  | up        |
|           | Cluster-12951.71771  | up        |
|           | Cluster-12951.82321  | down      |
| HID       | Cluster-12951.93932  | down      |
|           | Cluster-12951.149843 | down      |
|           | Cluster-12951.93900  | down      |
| I2'H      | Cluster-12951.99569  | down      |
|           | Cluster-12951.51547  | down      |
| VR        | Cluster-12951.84083  | up        |
|           | Cluster-12951.84115  | up        |
|           | Cluster-12951.13203  | down      |

Note: Down represents the content of the gene in the white part of *R. liliiflorum* (W) higher than the yellow part (Y). Up indicates that the content of the white (W) of the gene is lower than the yellow part (Y).
